# Supplementary material
Source: Research Square preprint supplement (doi:10.21203/rs.3.rs-8746909/v1)
Supplement: Supplementary file 1 [file aad3d225c322d635a658b428.xlsx]

## Sheet: Sheet1
River	Location	Site	Feather-Type	Mean of 3 readings of PFOS	Mean of 3 readings of PFOA
Sutlej	Upstream	S1	COMMON KINGFISHER	23.62	121
Sutlej	Upstream	S1	WHITE THROATED KINGFISHER	28.81	135
Sutlej	Upstream	S1	WHITE EGRET	20.05	12.1
Sutlej	Upstream	S2	COMMON KINGFISHER	22.71	120
Sutlej	Upstream	S2	WHITE THROATED KINGFISHER	28.02	136
Sutlej	Upstream	S2	WHITE EGRET	33.39	125
Sutlej	Upstream	S3	COMMON KINGFISHER	18.82	116
Sutlej	Upstream	S3	WHITE THROATED KINGFISHER	27.24	131
Sutlej	Upstream	S3	WHITE EGRET	32.54	145
Sutlej	Upstream	S4	COMMON KINGFISHER	20.23	118
Sutlej	Upstream	S4	WHITE THROATED KINGFISHER	26.38	128
Sutlej	Upstream	S4	WHITE EGRET	33.4	141
Sutlej	Downstream	S5	COMMON KINGFISHER	19.24	117
Sutlej	Downstream	S5	WHITE THROATED KINGFISHER	22.23	129
Sutlej	Downstream	S5	WHITE EGRET	31.06	142
Sutlej	Downstream	S6	COMMON KINGFISHER	21.96	108
Sutlej	Downstream	S6	WHITE THROATED KINGFISHER	23.24	121
Sutlej	Downstream	S6	WHITE EGRET	31.76	131
Sutlej	Downstream	S7	COMMON KINGFISHER	78.96	106
Sutlej	Downstream	S7	WHITE THROATED KINGFISHER	23.22	121
Sutlej	Downstream	S7	WHITE EGRET	31.54	129
Sutlej	Downstream	S8	COMMON KINGFISHER	15.18	108
Sutlej	Downstream	S8	WHITE THROATED KINGFISHER	22.15	125
Sutlej	Downstream	S8	WHITE EGRET	32.96	128
Ravi	Upstream	S9	COMMON KINGFISHER	16.98	106
Ravi	Upstream	S9	WHITE THROATED KINGFISHER	21.99	120
Ravi	Upstream	S9	WHITE EGRET	32.96	136
Ravi	Upstream	S10	COMMON KINGFISHER	17.23	108
Ravi	Upstream	S10	WHITE THROATED KINGFISHER	23.63	121
Ravi	Upstream	S10	WHITE EGRET	28.61	121
Ravi	Upstream	S11	COMMON KINGFISHER	18.24	116
Ravi	Upstream	S11	WHITE THROATED KINGFISHER	26.62	121
Ravi	Upstream	S11	WHITE EGRET	28.65	130
Ravi	Upstream	S12	COMMON KINGFISHER	22.24	108
Ravi	Upstream	S12	WHITE THROATED KINGFISHER	31.96	120
Ravi	Upstream	S12	WHITE EGRET	28.99	121
Ravi	Upstream	S13	COMMON KINGFISHER	19.34	106
Ravi	Upstream	S13	WHITE THROATED KINGFISHER	23.26	121
Ravi	Upstream	S13	WHITE EGRET	22.25	122
Ravi	Upstream	S14	COMMON KINGFISHER	21.82	109
Ravi	Upstream	S14	WHITE THROATED KINGFISHER	23.63	120
Ravi	Upstream	S14	WHITE EGRET	30.01	125
Ravi	Downstream	S15	COMMON KINGFISHER	20.71	115
Ravi	Downstream	S15	WHITE THROATED KINGFISHER	23.76	125
Ravi	Downstream	S15	WHITE EGRET	29.54	126
Ravi	Downstream	S16	COMMON KINGFISHER	22.52	117
Ravi	Downstream	S16	WHITE THROATED KINGFISHER	23.22	126
Ravi	Downstream	S16	WHITE EGRET	28.21	126
Ravi	Downstream	S17	COMMON KINGFISHER	19.92	120
Ravi	Downstream	S17	WHITE THROATED KINGFISHER	25.44	135
Ravi	Downstream	S17	WHITE EGRET	29.32	127
Ravi	Downstream	S18	COMMON KINGFISHER	21.24	116
Ravi	Downstream	S18	WHITE THROATED KINGFISHER	25.77	129
Ravi	Downstream	S18	WHITE EGRET	31.34	131
Ravi	Downstream	S19	COMMON KINGFISHER	31.34	116
Ravi	Downstream	S19	WHITE THROATED KINGFISHER	18.24	126
Ravi	Downstream	S19	WHITE EGRET	24.25	129
Ravi	Downstream	S20	COMMON KINGFISHER	18.77	120
Ravi	Downstream	S20	WHITE THROATED KINGFISHER	23.87	136
Ravi	Downstream	S20	WHITE EGRET	29.5	128
